# A compound Dirichlet-Multinomial model for provincial level Covid-19 predictions in South Africa

Alta de Waal<sup>\*1,2</sup>Daan de Waal<sup>1,3</sup>

**1** Department of Statistics, University of Pretoria, Pretoria, South Africa

**2** Center for Artificial Intelligence (CAIR), Pretoria, South Africa

**3** Mathematical Statistics and Actuarial Science, University of the Free State, Bloemfontein, South Africa

\* alta.dewaal@up.ac.za

## Abstract

Accurate prediction of COVID-19 related indicators such as confirmed cases, deaths and recoveries play an important in understanding the spread and impact of the virus, as well as resource planning and allocation. In this study, we approach the prediction problem from a statistical perspective and predict confirmed cases and deaths on a provincial level. We propose the compound Dirichlet Multinomial distribution to estimate the proportion parameter of each province as mutually exclusive outcomes. Furthermore, we make an assumption of exponential growth of the total cumulative counts in order to predict future total counts. The outcomes of this approach is not only prediction. The variation of the proportion parameter is characterised by the Dirichlet distribution, which provides insight in the movement of the pandemic across provinces over time.

## Introduction

The global COVID-19 (C19) pandemic has urged governments globally to rapidly implement measures to reduce the number of infected cases and reduce pressure on the

health care system. Strategic decisions on measures such as quarantine, economic  
lockdown and social distancing depend on projections of number of infections, people  
requiring urgent medical attention and mortality. Already early on in the pandemic, it  
became clear that data on confirmed cases are plagued with uncertainty, because of the  
high number of asymptomatic cases, varying test protocols per country [1], as well as  
different symptoms in different regions [2]. For example, one mathematical approach to  
understanding the spread of infections is compartmental models such as Susceptible  
Exposed Infectious Recovered (SEIR) and Susceptible Infectious Recovered (SIR)  
models [3–5].

The approach of this paper is to predict the cumulative count of C19 confirmed  
cases and deaths across provinces in South Africa. We provide the following arguments  
for this approach:

- The spread of the pandemic in a country is not uniform, but characterized by regional hotspots such as Northern Italy [6] in Italy and New York in the USA.
- Although the test protocols and definition of infection may vary across countries [1], it is more likely to be consistent for multiple regions within a single country. Therefore, it makes sense to model the dependencies between provinces.
- For the purpose of resource planning and mitigation strategies, it is important to understand how the pandemic spreads and moves across provincial or district borders and how the infection proportions change over time. Our modelling approach shows the change in counts as proportions across provinces.

A simple approach to such a model would be the Multinomial distribution, a multivariate discrete distribution which models multiple mutually exclusive outcomes. The simplest application of the Multinomial distribution is determining whether a six-sided die is biased. This is determined by calculating the probability of throwing each one of the numbers from 1–6 by throwing the die multiple times. Uneven probabilities for one of the numbers might indicate an unfair die. There is, however, uncertainty associated with these calculated probabilities, which can be accounted for by following a Bayesian approach to the problem and fitting a prior to the Multinomial probability parameter. The conjugate prior for the Multinomial distribution is the

Dirichlet distribution which allows us to calculate a posterior distribution over the  
Multinomial proportions. This approach forms the basis of our methodology which we  
describe in more detail in the next section. The methodology is followed by a  
description of the South African data and then the application. We conclude the paper  
with a discussion of the results and future work.

## Methodology

The structure of the methodology section is as follows: We first describe the nature of  
categorical count data before introducing the compound Dirichlet Multinomial  
distribution and describing the methodology in detail according to these steps:

1. Update Dirichlet parameter.
2. Estimate categorical counts.
3. Validate the estimations with Q-Q plots.
4. Predict future total counts.
5. Validate predictions.
6. Predict future categorical counts

## Categorical data

Consider a sequence of  $N$  observations  $x_1, \dots, x_N$  where each observation  $x_i$  is a vector  
of length  $K$ , the number of categories, denoting numbers from  $1, \dots, M$  such that  
 $\sum_{k=1}^K x_{ik} = M$ .

**Illustration 1:** Let's say  $K = 4$  and  $M = 123$ . Then  $x_i = [13, 12, 42, 56]$  can be an  
observation. This is an outcome of the Multinomial distribution with parameters  $M$   
and  $Y$ .  $N$  such outcomes are observed and denoted by the matrix  $X$  with  $N$  rows and  
 $K$  columns. The objective is to estimate a future outcome  $x_{N+1}$  given  $M$ . The  
unknown parameter  $Y = y_1, \dots, y_K$  (where  $\sum_{k=1}^K y_k = 1$ ), however, varies all the time  
and this variability is characterized by the Dirichlet distribution [7].

The Dirichlet distribution of  $Y$  has parameters  $\alpha = (\alpha_1, \dots, \alpha_K)$  which are positive real numbers and the density function given by [8]:

$$p(Y|\alpha) = \frac{\Gamma(\sum_k \alpha_k)}{\prod_k \Gamma(\alpha_k)} \prod_k Y_k^{\alpha_k - 1}. \quad (1)$$

Conceptually, we are making  $N$  independent draws from a categorical distribution with  $K$  categories. Let us represent the  $N$  draws as random draws on the  $K$  variables and denote the number of times a particular category  $k$  has been seen among  $K$  categories as  $n_k$  with  $\sum_{i=1}^N x_{ik} = n_k$ .

**Illustration 2:** Moving closer to the application of this study and following up on Illustration 1 with  $K = 4$  and  $M = 264$ , let  $N = 17$  and suppose  $N$  is the number of days in the recorded dataset used to get to  $n_k$ . The variable of interest is the number of C19 deaths per day. After 17 days of daily observations of the number of C19 deaths, suppose the totals for 4 categories (provinces) are  $n_1 = 34, n_2 = 27, n_3 = 56, n_4 = 153$  with a total of  $M = 270$  deaths. Daily observations are not important, only the totals after the  $N = 17$  days. This is due to the fact that the likelihood function (discussed next) in the predictive distribution only depends on the numbers  $n_k$  from the last observation. In the next section we introduce the compound Dirichlet Multinomial distribution.

## The compound Dirichlet Multinomial distribution

Assume  $Y$  is distributed Dirichlet( $\alpha_1, \dots, \alpha_K$ ) and draw  $Y = y_1, \dots, y_K$  from this distribution.  $X|Y \sim \text{MN}(M, Y)$  and the marginal distribution of  $X$  is referred to as a compound Dirichlet-Multinomial (CDM) distribution with parameters  $M$  and  $(\alpha_1, \dots, \alpha_K)$  [9]. Let  $\sum_{k=1}^K \alpha_k = \alpha_0$ . The density function is given by:

$$\begin{aligned} f(X|M, \alpha_1, \dots, \alpha_K) &= p(\mathbf{x}|M, )p(Y|\alpha_1, \dots, \alpha_K) \\ &= \prod_k y_k^{n_k} \times \frac{\Gamma(\alpha_0)}{\prod_k \Gamma(\alpha_k)} \prod_k y_k^{\alpha_k - 1} \\ &= \frac{\Gamma(\alpha_0)}{\prod_k \Gamma(\alpha_k)} \prod_k y_k^{n_k + \alpha_k - 1} \\ &= \frac{\Gamma(\alpha_0)}{\prod_k \Gamma(\alpha_k)} \frac{\prod_k \Gamma(\alpha_k + n_k)}{\Gamma(\alpha_0 + n_k)}. \end{aligned} \quad (2)$$

The conditions  $\sum_{k=1}^K n_k = M, x_i \geq 0, n_k > 0, \alpha_k > 0$  must hold. 88

In a Bayesian framework, the predictive density function of a future  $X$ , say  $Z$  [10] 89  
 where  $Z|M \sim \text{MN}(M, Y)$  and  $Y|\alpha_1, \dots, \alpha_K \sim \text{Dirichlet}(\alpha_1, \dots, \alpha_K)$  is similar to the CDM 90  
 density function: Given  $x_i$  with values  $n_{(1)}, \dots, n_{(N)}$  of observed  $x$  values, the predictive 91  
 distribution of  $Z|n_{(1)}, \dots, n_{(N)} \sim \text{CDM}(M, (\alpha_1 + n_{(1)}, \dots, \alpha_K + n_{(K)}))$ . The density 92  
 function is given by: 93

$$f(Z|n_1, \dots, n_K) = \frac{M! \Gamma(\alpha_0)}{\Gamma(\alpha_0 + M)} \prod_{k=1}^K \frac{\Gamma(n_k + \alpha_k + z_k)}{z_k! \Gamma(n_k + \alpha_k)}, \sum_{k=1}^K z_k = M, z_k \geq 0. \quad (3)$$

Taking the mean  $E(z_k) = \frac{M(n_k + \alpha_k)}{\alpha_0 + M}$  as prediction of  $z_k$ , we can predict the number of 94  
 outcomes for the  $k^{\text{th}}$  category. We've reached our goal of predicting  $x_{N+1}$  using: 95

$$\text{Pred}(x_{N+1,k}) = \frac{M(n_k + \alpha_k)}{\alpha_0 + M}, k = 1, \dots, K. \quad (4)$$

**Illustration 3:** Following up on Illustration 2, assume it is known that the Dirichlet 96  
 parameters are  $\alpha_1 = 33, \alpha_2 = 26, \alpha_3 = 55, \alpha_4 = 149$  with  $\alpha_0 = 263$ , the prediction of the 97  
 $18^{\text{th}}$  observations  $X_{18}$ , is  $\text{pred}(X_{18}) = [35, 28, 59, 160]$  and a total of  $M = 286$ . For the 98  
 purpose of this illustration, the value of  $M$  is known. 99

## Update 100

Suppose  $X_{N+1}$  has been predicted according to Eq. 4 and  $X_{N+1}$  is becoming available, 101  
 the aim is to predict  $X_{N+2}$  using the observed  $X_{N+1}$  and the new updated Dirichlet 102  
 parameters  $\alpha_k = n_k + \alpha_k, k = 1, \dots, K$ . This leads to the prediction of  $X_{N+2}$  as 103

$$\text{Pred}(x_{N+2,k}) = \frac{(M)(\mathbf{n}_k + \mathbf{\alpha}_k)}{\mathbf{\alpha}_0 + M}, k = 1, \dots, K, \quad (5)$$

where the bold symbols indicate the daily updated predictions. 104

## Validation 105

Eq 4 can be used to calculate estimations for each observation  $x$ . Q-Q 106  
 (Quantile-Quantile) plots can be used validate the estimations. A Q-Q plot is a 107  
 graphical method to compare two distributions by plotting their quantiles against each 108

other [11]. In our case, it is the empirical distribution (observations) against the CDM 109  
 estimations. A straight line is an indication of a good fit. Figure 1 illustrates the Q-Q 110  
 plot of the observed against estimated  $n_k$  for each  $x_N$  in the dataset. 111

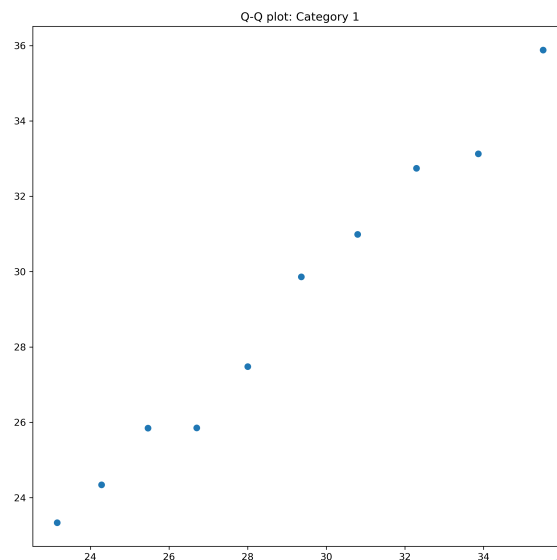

**Fig 1. Q-Q plot of category .** Observations are represented on the x-axis and 112  
 estimations on the y-axis.

## Predict ahead 112

Another application of the CDM model is to predict a number of observations ahead. 113  
 This is done by estimating the total number of counts (say number of deaths) -  $y$  - at 114  
 day  $x$  using an exponential fit  $y = \exp(a + bx)$ , or a straight line  $\log(y) = a + bx$ . Let 115  
 $x_0$  be the future day for which a prediction is to be made. The fitted line must thus be 116  
 extended to  $x = x_0$ . The prediction  $\text{pred}(x_0)$  can be made from the CDM model under 117  
 parameters  $M$  and  $\alpha_k$  as defined above. 118

## Validate predictions 119

We calculate the variation around the prediction by estimating the distances  $d$  of the 120  
 points  $(x_0, \log(y_0))$  to the line  $A \log(y) + Bx + C = 0$ . Then

$$d = \frac{|A \log(y_0) + Bx_0 + C|}{\sqrt{A^2 + B^2}}.$$

Let  $S_d$  be the estimated standard deviation of  $d$ . The uncertainty around the total value  $M$  is expressed as  $M \pm hS_d$ .

**Illustration 4:** Using the observed total counts, the estimation of the slope  $b$  and intercept  $a$  of the straight line  $\log(y) = a + bx$  are given by  $a = 4.79$  and  $b = 0.0475$ . We calculate the distances  $d$  of the points to the line  $A \log(y) + Bx + C = 0$  where  $A = 1, B = -b$  and  $C = -a$ . The standard deviation  $S_d = 0.0082$ . Figure 2 shows the fitted line with 3 standard deviations above and below.

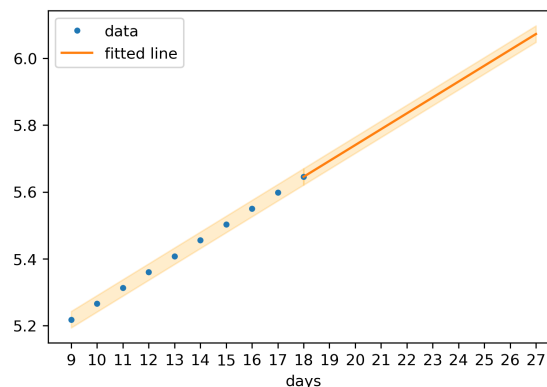

**Fig 2. Fitted straight line.** Fitted on  $\log(y)$  against  $x + 27$  with  $3 * S_d$  standard deviations.

**Illustration 5:** Suppose we want to predict the number of C19 deaths 10 days ahead from the current day. Let  $x_0 = 27$ . The estimated total number of deaths is  $M = 434$  (calculated by extending the straight line) with  $\text{Pred}(x_{27}) = [54, 43, 91, 246]$ . Comparing this prediction with  $\text{Pred}(x_{18})$  shows a significant increase in the number of deaths. A summary of the results of the illustrations is provided in Table 1.

**Table 1. Summary of results.**

|                       | Parameter                                | $n_1$ | $n_2$ | $n_3$ | $n_4$ | Total            |
|-----------------------|------------------------------------------|-------|-------|-------|-------|------------------|
| Observed day $N = 17$ | $n_k$                                    | 34    | 27    | 56    | 153   | $M = 270$        |
| Dirichlet parameter   | $\alpha_k$                               | 33    | 26    | 55    | 149   | $\alpha_0 = 263$ |
| $\text{Pred}(X_{18})$ | $\frac{M(n_i + \alpha_i)}{\alpha_0 + M}$ | 35    | 28    | 59    | 160   | $M = 286$        |
| Dirichlet updated     | $\alpha_k = \alpha_k + n_k$              | 70    | 51    | 106   | 320   | $\alpha_0 = 547$ |
| $\text{Pred}(X_{27})$ | $M_{27} \frac{\alpha_k}{\alpha_0}$       | 65    | 43    | 91    | 246   | $M_{27} = 434$   |

In this section, we discussed the methodology we're going to follow in detail. In the

next section, we describe the South African C19 data. 133

## Data 134

South Africa has a total population of 58,775,022 [12]. It consists of 9 provinces and 135  
the population per province is indicated in Table 2. 136

**Table 2. Population estimates for South Africa per province.** The abbreviation for each province is also indicated.

| Province      | Population | Abbreviation |
|---------------|------------|--------------|
| Gauteng       | 15,176,115 | GP           |
| KwaZulu-Natal | 11,289,086 | KZN          |
| Western Cape  | 6,844,272  | WC           |
| Eastern Cape  | 5,982,584  | EC           |
| Limpopo       | 4,592,187  | LP           |
| Mpumalanga    | 4,027,160  | MP           |
| North West    | 4,027,160  | NW           |
| Free State    | 2,887,465  | FS           |
| Northern Cape | 1,263,875  | NC           |

South Africa reported its first confirmed case of C19 on 5 March 2020 and first 137  
mortality on 27 March 2020. Since then, the number of confirmed cases have grown to 138  
34,357 confirmed cases and 705 mortalities by 1 June, 2020. Official numbers of C19 139  
confirmed cases, mortalities and recoveries in South Africa are shared by the National 140  
Institute for Communicable Diseases (NICD). This information is communicated to the 141  
public as infographics and during press releases by the Department of Health (DoH). 142  
The Data Science for Social Impact (DSFSI) research group at the University of 143  
Pretoria, South Africa has developed an open repository for South African C19 related 144  
data: <https://github.com/dsfsi/covid19za> [13]. The data is consolidated and 145  
disseminated on a provincial level and linked to a dashboard for visualisation 146  
purposes [14]. For the purpose of this study, C19 deaths are summed for these smaller 147  
provinces: Limpopo, Mpumalanga, North West and Northern Cape because the numbers 148  
are still very low. Although Free State has the second smallest population, the province 149  
experienced an early outbreak in March 2020 of the disease. For this reason, Free State 150  
is considered individually, and not part of the grouped smaller provinces. The datasets 151  
are visualised in Figures 3 and 4. The counts are also indicated in text boxes at the last 152



day. Figure 3 indicates missing data of confirmed cases for two days. The missing data points are imputed with the rounded average of the two adjacent days' count. 153  
154

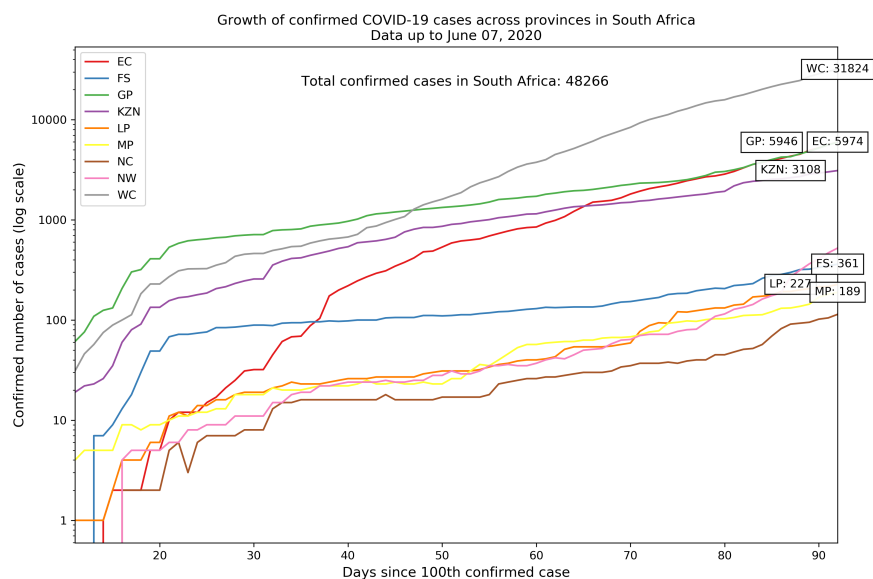

**Fig 3. C19 confirmed cases growth in South Africa.** Province-level data is not available for two days (indicated by the gaps in the growth lines).

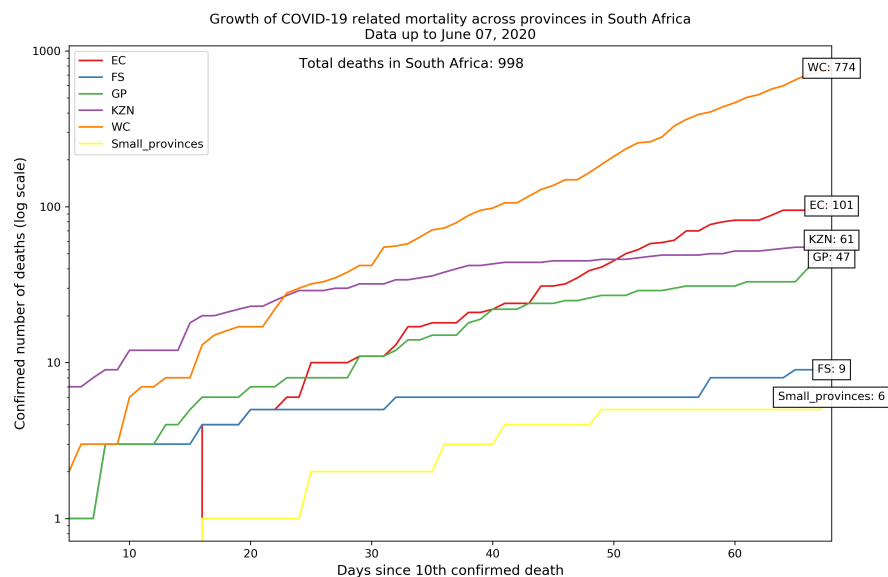

**Fig 4. C19 related mortality growth in South Africa.** Four smaller provinces are summed into one count 'Smaller\_provinces'.

## Application

We apply the steps as outlined in the methodology section on the two South African C19 datasets, namely cumulative confirmed cases and cumulative confirmed mortalities. In both cases, we use the daily counts for the month of May 2020 to calculate the parameter estimations. We use the available data for the month of June 2020 for predictions.

### C19 confirmed cases

The first step in the process is to update the Dirichlet parameter  $\alpha_k$  for each province  $k$ . We use the 31 total counts of confirmed cases in May for  $M$  in Equation 4 and update  $\alpha_k$  at each day. Since the first confirmed case was recorded on 5 March, the 31 observations in our training set are day 55 - day 85. The change in proportions over time is illustrated in Figure 5. Western Cape (WC), for example changed from having 42% of South Africa's C19 confirmed cases on day 55 (1 May 2020) to 60% on day 85 (end of May).

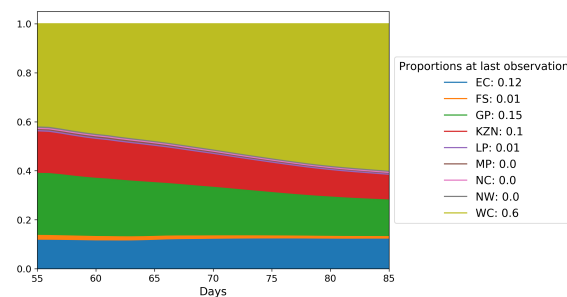

**Fig 5. C19 confirmed cases Dirichlet parameter  $\alpha_k$  for each province.**

In order to validate the estimations  $x_{55} - x_{85}$ , we draw Q-Q plots for each province which are shown in Figure 6. The Q-Q plots of the larger provinces (EC, GP, WC) confirms a good fit.

The next step is to predict new confirmed cases. First, we fit a straight line to the log transformation of the daily counts. Figure 7 shows the fit of the straight line  $\log(y) = 5.578 + 0.0569x$  with the upper and lower bounds according to the standard deviation of the distances  $d$  between the observed  $y$  and the line as described in the methodology section. The  $\text{std}(d)$  is  $s = 0.01$ . Extending  $x$  provides us with an estimation of  $M$  for future counts. Figure 8 shows this extension (transformed back to

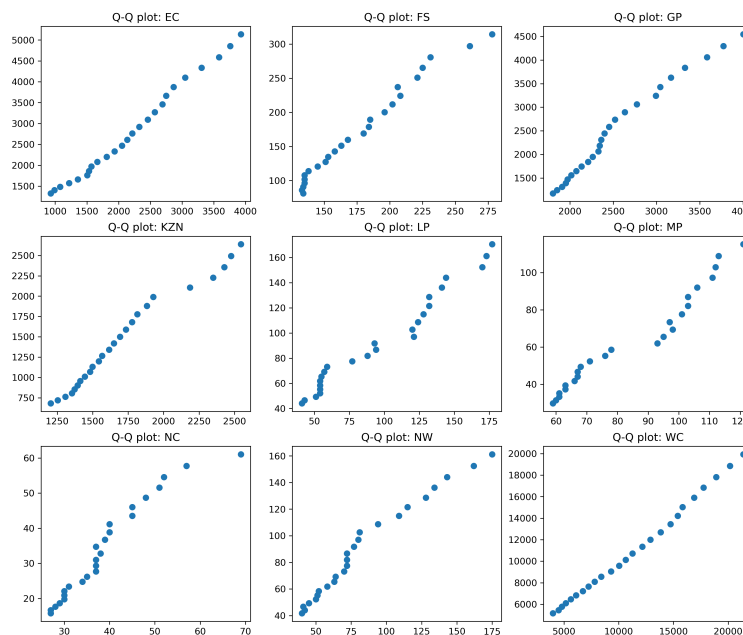

**Fig 6. C19 confirmed cases Q-Q plots.** The x-axis represents observations and the y-axis represents estimations.

the exponential domain). The dots on the future prediction curve are observations of June which are not included in the training set. 178  
179

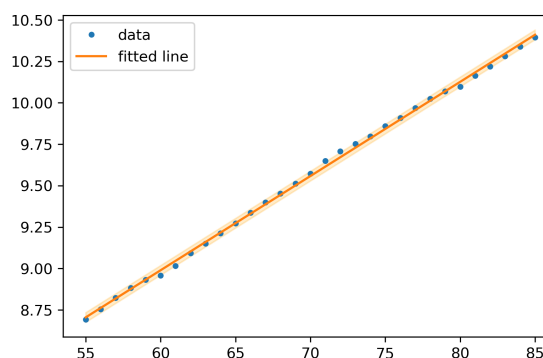

**Fig 7. Straight line fitted to the log of daily confirmed cases.** The cumulative daily counts are represented by the variable  $y$  and each day is represented by  $x$ .  $x$  range from day 55 to day 85.

Figure 9 shows the prediction per province. The provinces Eastern Cape (EC), Gauteng (GP) and Western Cape (WC) show good predictions. The same good fit is seen in the Q-Q plots of Figure 6. 180  
181  
182

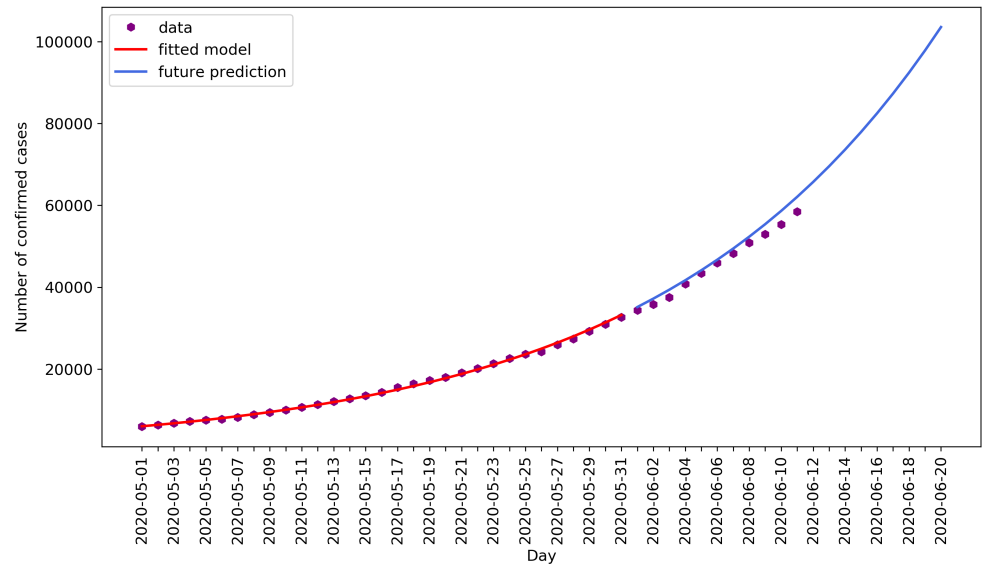

**Fig 8. C19 confirmed cases predictions.** The red line represents the estimations on training data, and the blue line represents estimations on test data as well as future predictions.

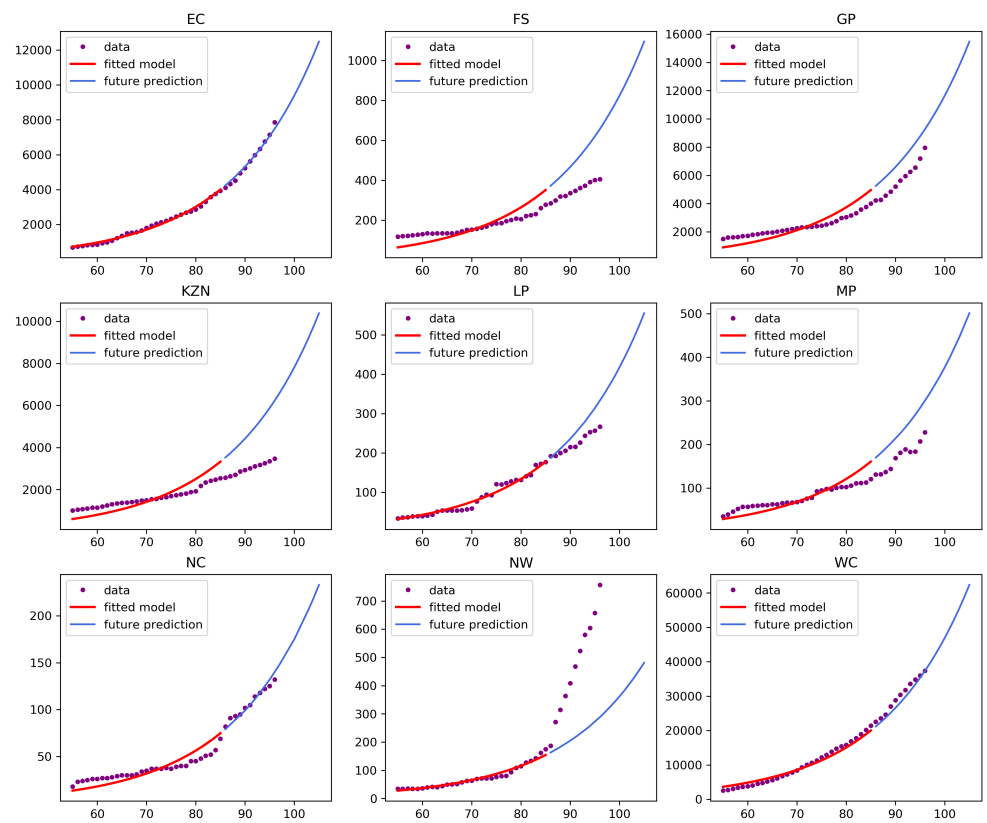

**Fig 9. C19 confirmed cases predictions per province**

## C19 related mortalities

183

As with confirmed cases, we use the month of May as training data for C19 related mortalities. The first death was recorded on 27 March 2020 and the 31 observations in our training set are day 31 - day 61. We apply the same methodology than with the confirmed cases dataset. Figure 10 shows the proportion movement over time. This figure reflects similar behaviour than Figure 5 although Gauteng (GP) has a smaller proportion deaths than confirmed cases.

184

185

186

187

188

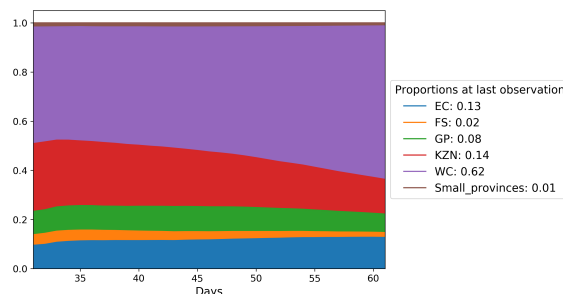

Fig 10. C19 deaths Dirichlet parameter  $\alpha_k$  for each province.

189

The Q-Q plots are shown in Figure 11. We omit the counts for FS and Small\_provinces as they are too small to produce meaningful Q-Q plots.

190

191

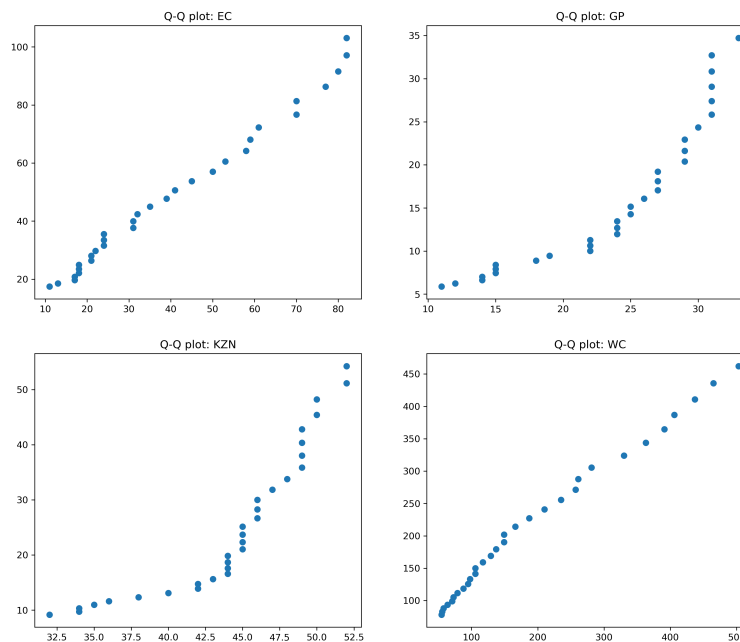

Fig 11. QQ plots for EC, GP KZN and WC

Figure 12 shows the fit of the straight line  $\log(y) = 2.89 + 0.059x$  with  $3 * S$  upper

192

and lower bounds. The  $\text{std}(d)$  is  $s = 0.021$ .

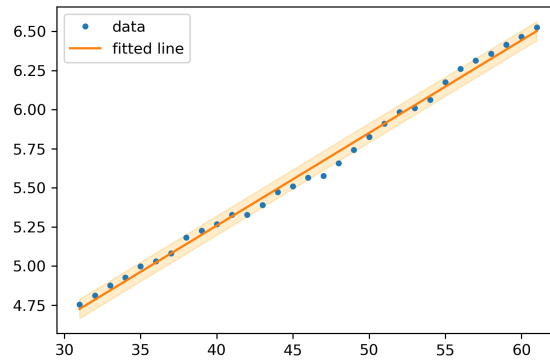

**Fig 12. Straight line fitted to the log of daily deaths.** The cumulative daily counts are represented by the variable  $y$  and each day is represented by  $x$ .  $x$  range from day 31 to day 61.

Figure 13 indicates the prediction on observed (red line) and unobserved (blue line) data.

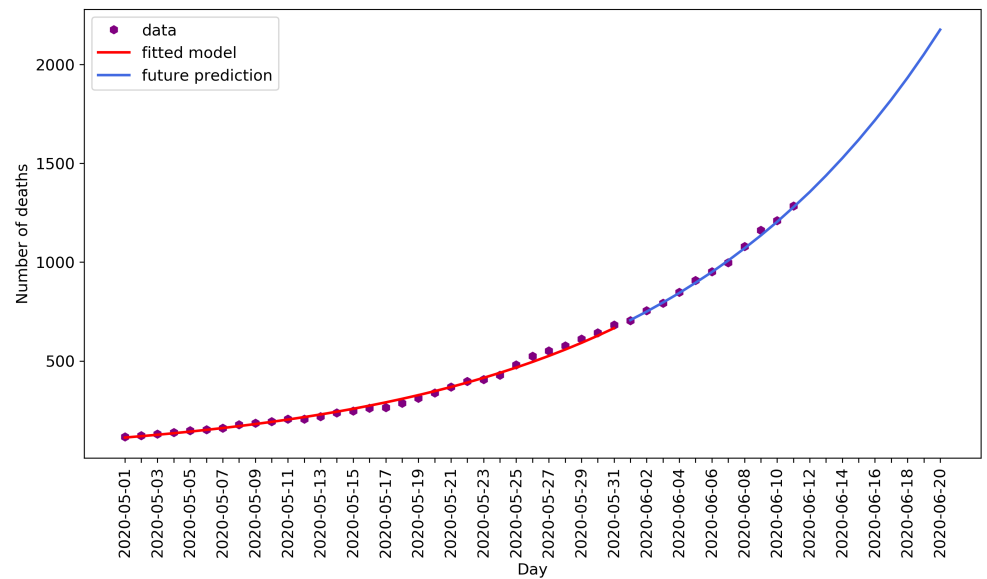

**Fig 13. C19 related mortality predictions.** The red line represents the estimations on training data, and the blue line represents estimations on test data as well as future predictions.

Finally we show the C19 related mortalities predictions per province in Figure 14. From this graph it can be seen that Eastern Cape (EC) and Western Cape (WC) follow an exponential pattern as per our assumption. These two provinces contribute 75% of the total deaths.

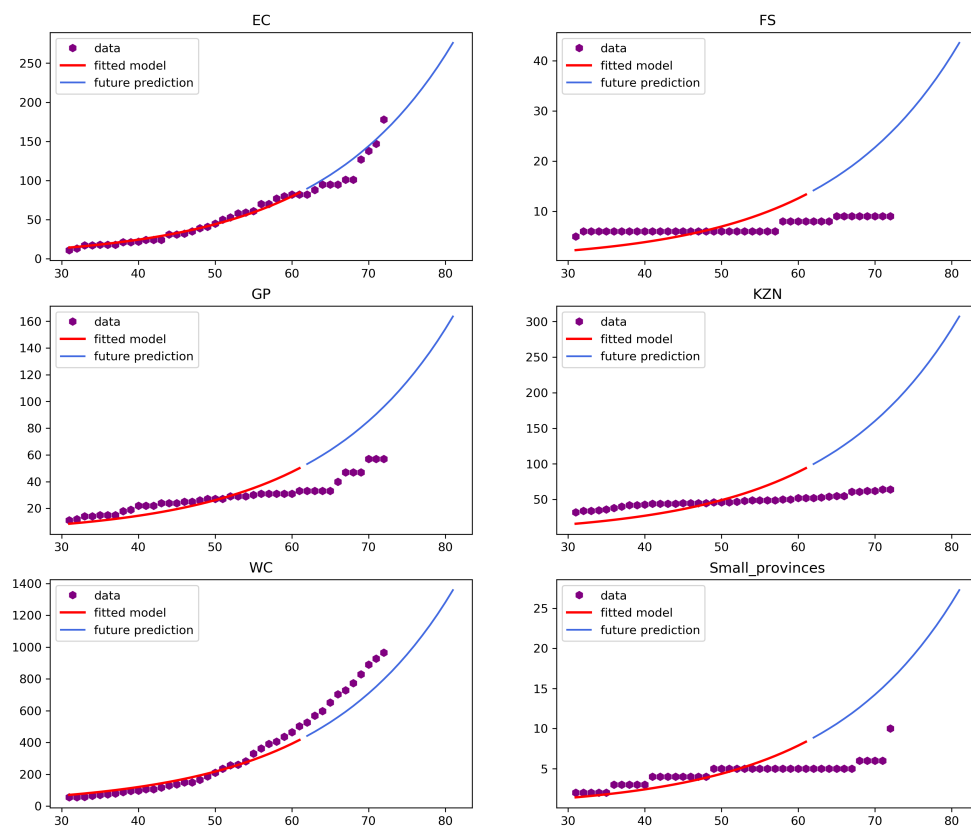

Fig 14. C19 related mortality predictions per province

## Conclusion

In this paper we present the compound Dirichlet Multinomial distribution to model COVID-19 related count data per province as mutually exclusive categories. Taking into account that test protocols and positive case definitions are more likely to be consistent within a country than across legislative borders, we can assume dependencies of the pandemic's key indicators across provincial borders. The benefit of this assumption is that we can track the change in Multinomial probabilities over time. This is done by placing a Dirichlet prior over the Multinomial probability parameter. A practical illustration of this in the paper is the change in Western Cape's C19 confirmed cases over time as a proportion of the total cases in South Africa. The benefit of the Bayesian approach in this case, is that we can express the uncertainty associated with the provincial-level probabilities.

We apply this model to the prediction of future cases by assuming that the log transformation of the total counts follows a straight line. In the application section we

show the prediction results. The total confirmed cases (Figure 8) and dominant 214  
provinces (EC, GP and WC in Figure 9) show satisfactory predictions of unseen data. 215  
The C19 related mortality predictions follow an exponential pattern for these same 216  
provinces (Figure 14) 217

At the core of making future predictions is the assumption that the pandemic follows 218  
an exponential growth. As the pandemic progresses, the slope changes and the training 219  
data range must be restricted to only include a consistent slope. The implication of this 220  
that the predictions are limited to short and medium term. Future work includes using 221  
change point detections [3] to determine the training data range. Alternatively, dates of 222  
lockdown level changes (with a lag) can be considered in selecting the training data 223  
range. Finally, the model can be applied on a district level, such as districts within 224  
Western Cape. Such data is available for most provinces on 225  
<https://github.com/dsfsi/covid19za> [13]. 226

## References

1. World Health Organization (WHO). Report of the WHO-China Joint Mission on Coronavirus Disease 2019 (COVID-19). The WHO-China Joint Mission on Coronavirus Disease 2019. 2020;1(February):40.
2. Lechien JR, Chiesa-Estomba CM, Place S, Van Laethem Y, Cabaraux P, Mat Q, et al. Clinical and Epidemiological Characteristics of 1,420 European Patients with mild-to-moderate Coronavirus Disease 2019. *Journal of Internal Medicine*. 2020; p. 0–2. doi:10.1111/joim.13089.
3. Mbuva R, Marwala T. Bayesian Inference of COVID-19 Spreading Rates in South Africa. *medRxiv*. 2020; p. 2020.04.28.20083873. doi:10.1101/2020.04.28.20083873.
4. Mbuva RR, Marwala T. On Data-Driven Management of the COVID-19 Outbreak in South Africa. *medRxiv*. 2020; p. 2020.04.07.20057133. doi:10.1101/2020.04.07.20057133.
5. Ferguson N, Laydon D, Nedjati-Gilani G, Imai N, Ainslie K, Baguelin M, et al. Report 9 - Impact of non-pharmaceutical interventions (NPIs) to reduce



- COVID-19 mortality and healthcare demand. Imperial College COVID Response Team. 2020;.
6. Goumenou M, Sarigiannis D, Tsatsakis A, Anesti O, Docea AO, Petrakis D, et al. Covid-19 in Northern Italy: An integrative overview of factors possibly influencing the sharp increase of the outbreak (Review). *Molecular Medicine Reports*. 2020;22(1):20–32. doi:10.3892/mmr.2020.11079.
  7. Gelman A, Carlin JB, Stern HS, Dunson DB, Vehtari A, Rubin DB. *Bayesian Data Analysis Third edition*. 2020;.
  8. DeGroot M. *Optimal statistical decisions*. John Wiley & Sons; 1970.
  9. Johnson NL, Kotz S, Balakrishnan N. *Discrete Multivariate Distributions*. New York: Wiley; 1997.
  10. Geisser S. Bayesian Estimation in Multivariate Analysis. *The Annals of Mathematical Statistics*. 1965;36(1):150–159.
  11. Rice J. *Mathematical Statistical Analysis and Data analysis*. Duxbury Press; 1995.
  12. Statistics South Africa. *Midyear Population Estimate 2019*. 2020;.
  13. Marivate V, Combrink HM. A Framework For Sharing Publicly Available Data To Inform The COVID-19 Outbreak in Africa: A South African Case Study. 2020;.
  14. Marivate V. COVID 19 ZA South Africa Dashboard;. Available from: <https://datastudio.google.com/u/0/reporting/1b60bdc7-bec7-44c9-ba29-be0e043d8534/page/hrUIB>.
